# Supplementary material for: Using the inherent chemistry of the endothelin-1 peptide to develop a rapid assay for pre-transplant donor lung assessment
Source: Royal Society of Chemistry journal article supplement (doi:10.1039/c5an01536g), 2015-01-01
Supplement: c5an01536g2.pdf [file c5an01536g2.pdf]

*Supporting Information for:*

**Using the inherent chemistry of the endothelin-1 peptide to develop a rapid assay for pre-transplant donor lung assessment**

Andrew T. Sage,<sup>a</sup> Xiaohui Bai,<sup>b,c</sup> Marcelo Cypel,<sup>b,c</sup> Mingyao Liu,<sup>b,c</sup> Shaf Keshavjee,<sup>b,c</sup> and Shana O. Kelley<sup>a,d\*</sup>

<sup>a</sup> Department of Pharmaceutical Sciences, Leslie Dan Faculty of Pharmacy, University of Toronto, Toronto, ON, M5S 3M2, Canada.

<sup>b</sup> Division of Thoracic Surgery, University of Toronto, Toronto, ON, M5G 1L7, Canada.

<sup>c</sup> Latner Thoracic Surgery Research Laboratories, Toronto General Research Institute, University Health Network, Toronto, ON, M5G 1L7, Canada.

<sup>d</sup> Department of Biochemistry, Faculty of Medicine, University of Toronto, Toronto, ON, M5S 3M2, Canada.

\*shana.kelley@utoronto.ca

**SI Figure 1.** ET-1 biosensor characteristics

**SI Figure 2.** ET-1 detection in PBS

**SI Table 1.** Estimated ET-1 concentrations in PBS

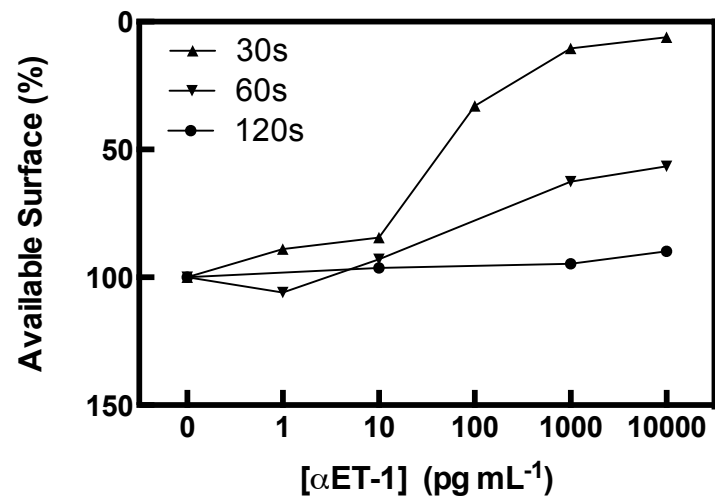

**SI Figure 1. ET-1 biosensor characteristics.** Currents obtained (reported as % available surface for various concentrations of ET-1 antibody bound to the ET-1 peptide SAM ( $1 \text{ ng mL}^{-1}$ ) for sensors that were electrodeposited for 30 (triangles), 60 (inverted triangles), or 120 (circles) seconds.

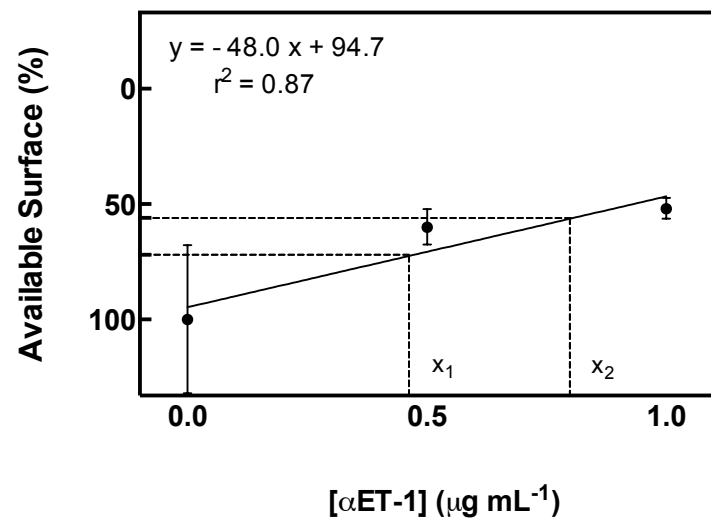

**SI Figure 2. ET-1 detection in PBS.** Currents obtained (reported as % available surface) for the oxidation of ferrocyanide at the electrode surface for the detection of ET-1 in PBS. The equation and goodness of fit for the standard curve (circles, solid line) are shown in the upper left quadrant of the graph. Each point represents  $n = 5$  different sensors and error-bars indicate s.e.m. The dashed lines represent the observed % available surface for two unknown ET-1 concentrations,  $x_1$  and  $x_2$ , extrapolated to theoretical anti-ET-1 concentrations.

**SI Table 1. Estimated ET-1 concentrations in PBS.**

| Buffer | Unknown Sample | % Available Surface | [ $\alpha$ ET-1] Calculated (ng mL <sup>-1</sup> ) | [ET-1] Calculated (ng mL <sup>-1</sup> )* | [ET-1] Actual (ng mL <sup>-1</sup> ) |
|--------|----------------|---------------------|----------------------------------------------------|-------------------------------------------|--------------------------------------|
| PBS    | x <sub>1</sub> | 72.0                | 472                                                | 528                                       | 500                                  |
|        | x <sub>2</sub> | 56.0                | 806                                                | 194                                       | 250                                  |

\*Calculated [ET-1] is obtained from the following equation: [ET-1]calc. = [ $\alpha$ ET-1] added – [ $\alpha$ ET-1] calculated where [ $\alpha$ ET-1] added is 1  $\mu$ g mL<sup>-1</sup> and [ $\alpha$ ET-1] calculated is obtained by solving the equation of the line in SI Fig 2. .
